# Supplementary material for: Designable and dynamic single-walled stiff nanotubes assembled from sequence-defined peptoids
Source: PubMed Central journal article supplement (PMC5773689; doi:10.1038/s41467-017-02059-1), 2018-01-18
Supplement: 41467_2017_2059_MOESM2_ESM.pdf [file 41467_2017_2059_MOESM2_ESM.pdf]

## **Description of Additional Supplementary Files**

File Name: Supplementary Movie 1

Description: Cross-sectional view of PNT's deformation simulated by FEM.

File Name: Supplementary Movie 1

Description: 3D view of PNT's deformation simulated by FEM.
